# Supplementary material for: Selective Closed-State Nav1.7 Blocker JZTX-34 Exhibits Analgesic Effects against Pain
Source: MDPI journal article supplement (doi:10.3390/toxins10020064), 2018-02-02
Supplement: s1 [file s1]

# Supplementary Materials: Selective Closed-State Nav1.7 Blocker JZTX-34 Exhibits Analgesic Effects against Pain

Xiongzhi Zeng, Pengpeng Li, Bo Chen, Juan Huang, Ren Lai, Jingze Liu, and Mingqiang Rong

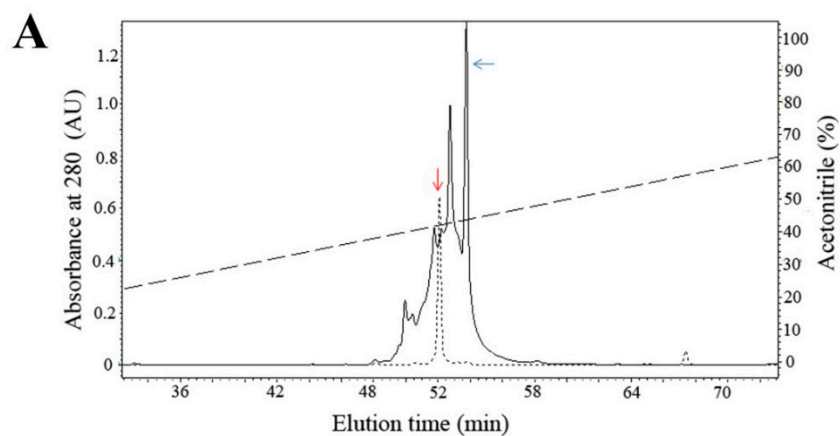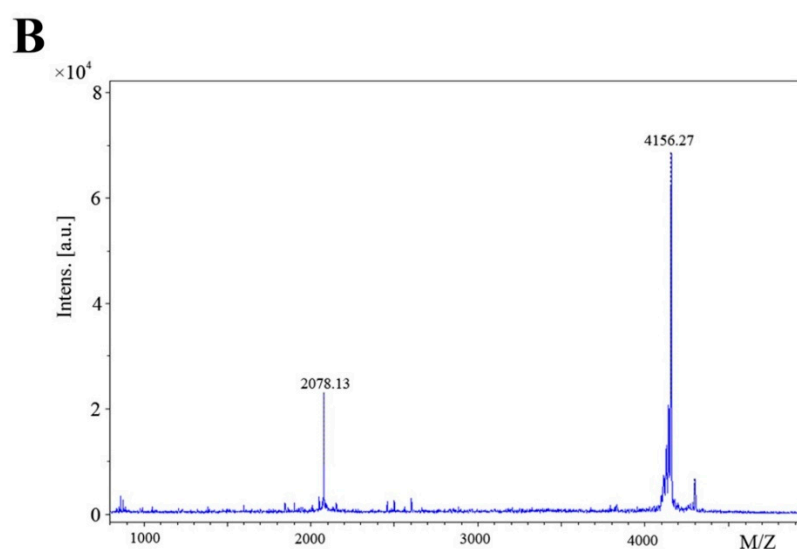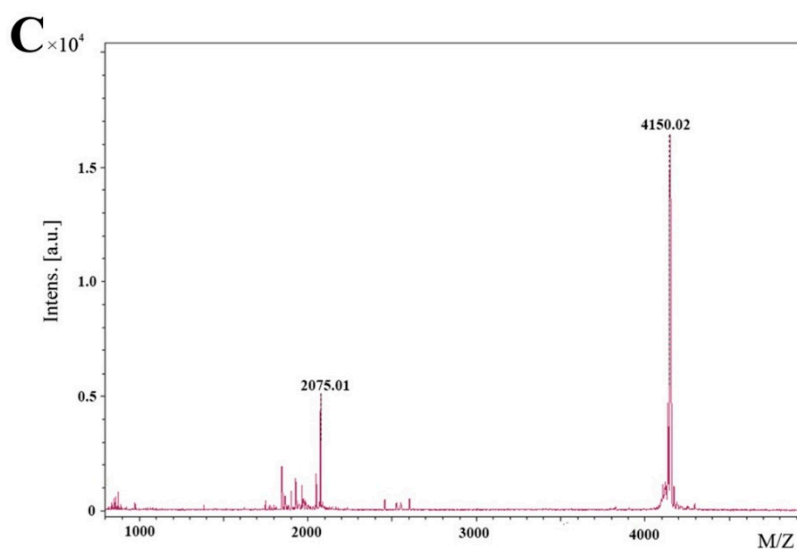

**Figure S1.** Identification of linear and refolded JZTX-34. (A) Linear and refolded JZTX-34 was separated by analytical reverse-phase HPLC (monitored at 280 nm). (B) MALDI-TOF mass spectra of synthetic JZTX-34. (C) MALDI-TOF mass spectra of refold JZTX-34.

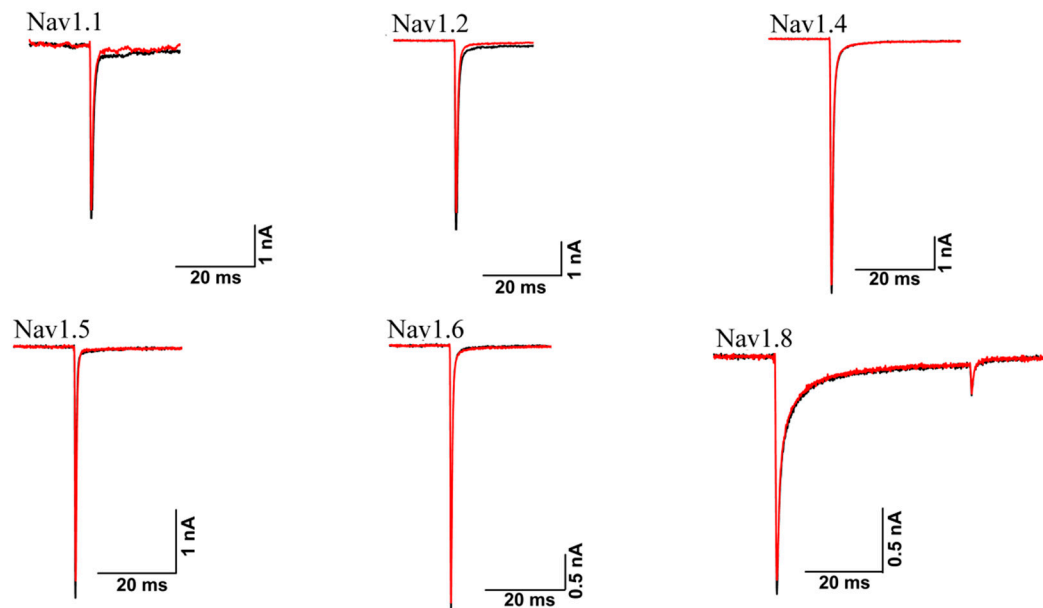

**Figure S2.** 1  $\mu$ M JZTX-34 showed no effect on Nav1.1, 1.2, 1.4, 1.5, 1.6 and 1.8. All inward sodium channels were elicited by a 50 ms depolarizing potential of  $-10$  mV from a holding potential of  $-80$  mV every 5 s.

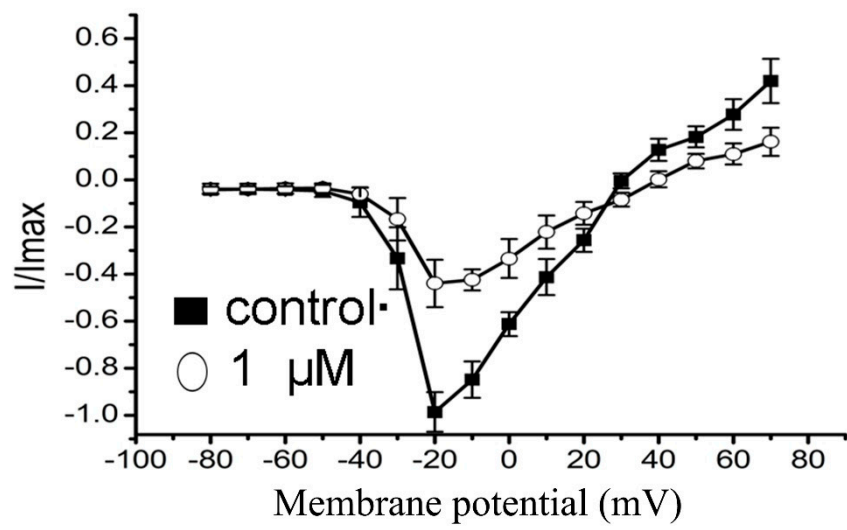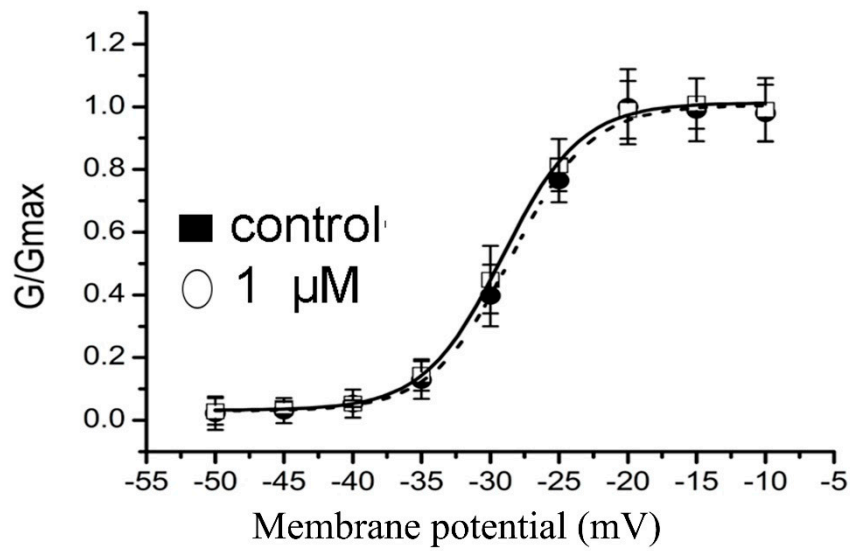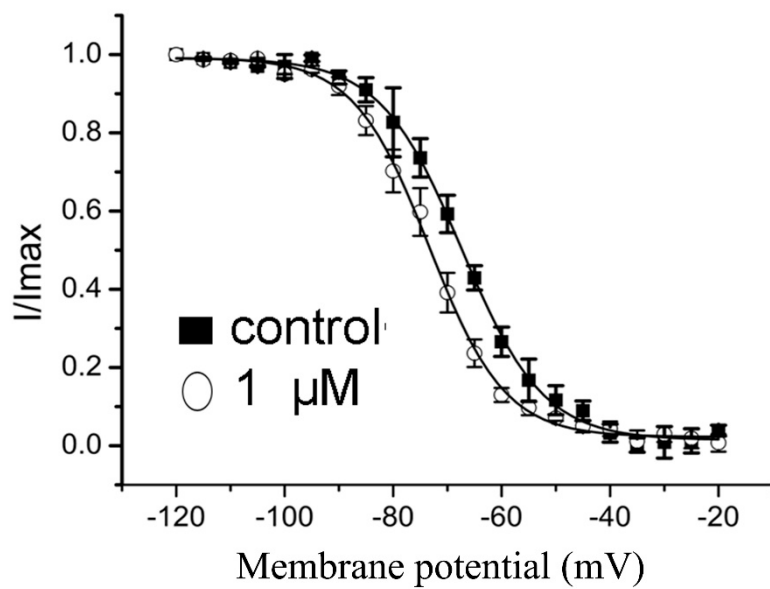

**Figure S3.** Effects of JZTX-34 on the current-voltage relationship and the steady-activation and inactivation of sodium channel subtypes Nav1.7. **(A)** Effect of 1  $\mu$ M toxin on the current-voltage relationship of sodium currents. Cells were held at  $-80$  mV, and sodium currents were induced by 50 ms depolarizing steps to various potentials ranging from  $-80$  to  $+80$  mV with 10 mV increments. **(B)** Effect of 1  $\mu$ M toxin on the steady-activation of Nav1.7. The steady-activation kinetics was estimated based on the data from A. The conductance was calculated using the equation  $G(\text{Nav}) = I/(V - V_{rev})$  in which  $I$ ,  $V$ ,  $V_{rev}$  represent inward current value, membrane potential, and reversal potential, respectively. Data were plotted as a fraction of the maximum conductance. **(C)** Effect of 1  $\mu$ M toxin on steady-state inactivation of Nav1.7. The voltage dependence of steady-state inactivation was estimated using a standard double pulse protocol in which sodium currents were induced by a 20 ms depolarizing potential of  $-10$  mV following a 500 ms prepulse at potentials that ranged from  $-100$  mV to  $-10$  mV. Currents were plotted as a fraction of the maximum peak current. Data points (mean $\pm$ S.E.) were fitted according to the boltzmann equation ( $n=5$ ).
